# Supplementary material for: Remote land use impacts on river flows through atmospheric teleconnections
Source: Copernicus journal article supplement (doi:10.5194/hess-22-4311-2018), 2018-08-15
Supplement: Supplementary file [file hess-22-4311-2018-supplement.pdf]

Supplement of Hydrol. Earth Syst. Sci., 22, 4311–4328, 2018  
<https://doi.org/10.5194/hess-22-4311-2018-supplement>  
© Author(s) 2018. This work is distributed under  
the Creative Commons Attribution 4.0 License.

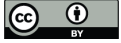

*Supplement of*

## **Remote land use impacts on river flows through atmospheric teleconnections**

**Lan Wang-Erlandsson et al.**

*Correspondence to:* Lan Wang-Erlandsson (lan.wang@su.se)

The copyright of individual parts of the supplement might differ from the CC BY 4.0 License.

## Supplementary Information

*Table S1. Methods for estimating land-use change impacts on rainfall or river flows.*

| Method                             | Key merits                                                                                                                                                                                                                       | Key limitations*                                                                                                                                                                                                         | References                                                              |
|------------------------------------|----------------------------------------------------------------------------------------------------------------------------------------------------------------------------------------------------------------------------------|--------------------------------------------------------------------------------------------------------------------------------------------------------------------------------------------------------------------------|-------------------------------------------------------------------------|
| Earth System Model (ESM)           | - Inclusion of multiple land-atmosphere-ocean feedbacks<br>- Water balance closure                                                                                                                                               | - Computationally costly.<br>- Does not always include irrigation.                                                                                                                                                       | (Betts et al., 2015; Garcia et al., 2016)                               |
| General circulation model (GCM)    | - Inclusion of multiple land-atmosphere-ocean feedbacks. (Sea surface temperature can be fixed to increase the signal-to-noise ratio.)<br>- Coupled models close the water balance.                                              | - Considerable noise in precipitation and runoff change (i.e., few grid cells passing significance test).<br>- Does not always include irrigation.<br>- Difficult to understand mechanisms.<br>- Computationally costly. | (Bring et al., 2015; Findell et al., 2007; Pitman et al., 2009)         |
| Regional climate model (RCM)       | - Simulation of changes in convection and orographic precipitation<br>- Can simulate enhanced local rainfall from deforested patches<br>- Higher signal-to-noise ratio for precipitation change due to fixed boundary conditions | - Limitations in representing clouds<br>- Potentially ignores water balance closure<br>- No feedback across fixed regional boundaries                                                                                    | (Bagley et al., 2014; Lawrence and Vandecar, 2014)                      |
| Offline land surface model (LSM)   | - Often includes irrigation.                                                                                                                                                                                                     | - No land-atmosphere feedback.<br>- No water balance closure.                                                                                                                                                            | (Gerten et al., 2008; Rost et al., 2008a, 2008b; Sterling et al., 2012) |
| Observations                       | - Observed                                                                                                                                                                                                                       | - Correlation rather than causation, thus, often combined with modelling.<br>- Challenging attribution due to concurrent climate change and LUC                                                                          | (Spracklen et al., 2012)                                                |
| Meta-analysis                      | - Synthesis results from many different types of studies                                                                                                                                                                         | - Limitation in spatially and temporally resolved estimates                                                                                                                                                              | (Spracklen and Garcia-Carreras, 2015)                                   |
| Two-way coupled moisture recycling | - Includes irrigation<br>- Phenology (LAI) responds to precipitation change<br>- Water balance closure<br>- Computationally efficient                                                                                            | - Ignoring other types of land-atmosphere feedback.                                                                                                                                                                      | This study, (Keys et al., 2016)                                         |

\*Limitations of most models in simulating vegetation feedback (e.g., rooting depth adjustment), disturbance processes (e.g., pathogens), and societal response (e.g., behavioural change) (Reyer et al., 2015).

*Table S2. Land-cover and land-use parameterisation in STEAM.*

| Unit                                                 | Group    | LAI <sub>max</sub> | LAI <sub>min</sub> | $\alpha$ | $h_{max}$ | $h_{min}$ | $z_{og}$ | $r_{st,min}$      |
|------------------------------------------------------|----------|--------------------|--------------------|----------|-----------|-----------|----------|-------------------|
|                                                      |          | -                  | -                  | -        | m         | m         | m        | s m <sup>-1</sup> |
| 01: Water (Wa)                                       | I – W    | 0                  | 0                  | 0.08     | 0         | 0         | 0.00137  | 0                 |
| 02: Tropical evergreen forest/woodland (TrE)         | II – F   | 5.5                | 5                  | 0.20     | 30        | 30        | 0.02     | 200               |
| 03: Tropical deciduous forest/woodland (TrD)         | II – F   | 5.5                | 1                  | 0.18     | 30        | 30        | 0.02     | 200               |
| 04: Temp. broadleaf evergreen forest/woodland (TeB)  | II – F   | 5.5                | 2                  | 0.18     | 25        | 25        | 0.02     | 200               |
| 05: Temp. needleleaf evergreen forest/woodland (TeN) | II – F   | 5.5                | 2                  | 0.15     | 17        | 17        | 0.02     | 300               |
| 06: Temp. deciduous forest/Woodland (TeD)            | II – F   | 5.5                | 0.5                | 0.18     | 25        | 25        | 0.02     | 200               |
| 07: Boreal evergreen forest/Woodland (BoE)           | II – F   | 5.5                | 2                  | 0.15     | 17        | 17        | 0.02     | 300               |
| 08: Boreal deciduous forest/Woodland (BoD)           | II – F   | 5.5                | 0.5                | 0.18     | 25        | 25        | 0.02     | 200               |
| 09: Evergreen/Deciduous Mixed Forest/Woodland (Mix)  | II – F   | 5                  | 1                  | 0.17     | 20        | 20        | 0.02     | 250               |
| 10: Savanna (Sav)                                    | III – S  | 2                  | 0.5                | 0.25     | 0.8       | 0.1       | 0.02     | 150               |
| 11: Grassland/Steppe (Gra)                           | III – S  | 2                  | 0.5                | 0.25     | 0.8       | 0.05      | 0.01     | 110               |
| 12: Dense Shrubland (DShr)                           | III – S  | 2.5                | 1                  | 0.2      | 1.5       | 1.5       | 0.02     | 200               |
| 13: Open shrubland (OShr)                            | III – S  | 1.5                | 0.5                | 0.15     | 1         | 1         | 0.02     | 200               |
| 14: Tundra (Tun)                                     | IV – B   | 2                  | 1                  | 0.15     | 0.8       | 0.1       | 0.01     | 80                |
| 15: Desert (Des)                                     | IV – B   | 0.1                | 0                  | 0.25     | 0.4       | 0         | 0.001    | 200               |
| 16: Polar desert/rock/ice (Ice)                      | IV – B   | 0                  | 0                  | 0.70     | 0         | 0         | 0.001    | 0                 |
| 17: Wetland (Wet)                                    | V – O    | 4                  | 1                  | 0.15     | 1         | 0.05      | 0.01     | 150               |
| 18: Urban (Urb)                                      | IV – B   | 1                  | 0.1                | 0.18     | 0.8       | 0         | 0.001    | 250               |
| 19: Pasture (Pas)                                    | III – S  | 2                  | 0.5                | 0.22     | 0.8       | 0.05      | 0.01     | 150               |
| 20: Rainfed cropland (RfCro)                         | VI – C   | 3.5                | 0.5                | 0.22     | 0.8       | 0.05      | 0.005    | 150               |
| 21: irrigated crop (IrCro)                           | VII – I  | 3.5                | 3.5                | 0.22     | 0.8       | 0.8       | 0.005    | 150               |
| 22: Irrigated rice (IrRic)                           | VIII – R | 3.5                | 3.5                | 0.22     | 0.8       | 0.8       | 0.005    | 150               |

LAI<sub>max</sub> is the maximum leaf area index, LAI<sub>min</sub> is the minimum leaf area index,  $\alpha$  is the albedo,  $h_{max}$  is the maximum plant height,  $h_{min}$  is the minimum plant height,  $z_{og}$  is the ground roughness, and  $r_{st,min}$  is the minimum stomatal resistance.

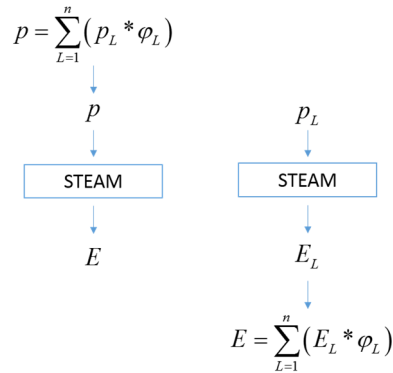

**Figure S1. Parametrisation procedures in STEAM in this study and in previous studies.** In the original version of STEAM (Wang-Erlandsson et al., 2014, 2016), each land cover ( $L$ ) is simulated for the whole world (“mosaic”), and the total terrestrial evaporation ( $E$ ) is obtained by weighing each land cover’s evaporation ( $E_L$ ) by its fractional spatial occupation ( $\phi_L$ ):  $E = \sum E_L \phi_L$ . In the coupled version of STEAM-WAM, we instead weigh each land cover specific parameter ( $p_L$ ) with the land cover fractional occupation within each group of land-use or land-cover type. This merged land cover parametrisation map ( $p$ ) is then used to simulate total evaporation (“mosaic-tile”):  $E(p) = E(\sum p_L \phi_L)$ .

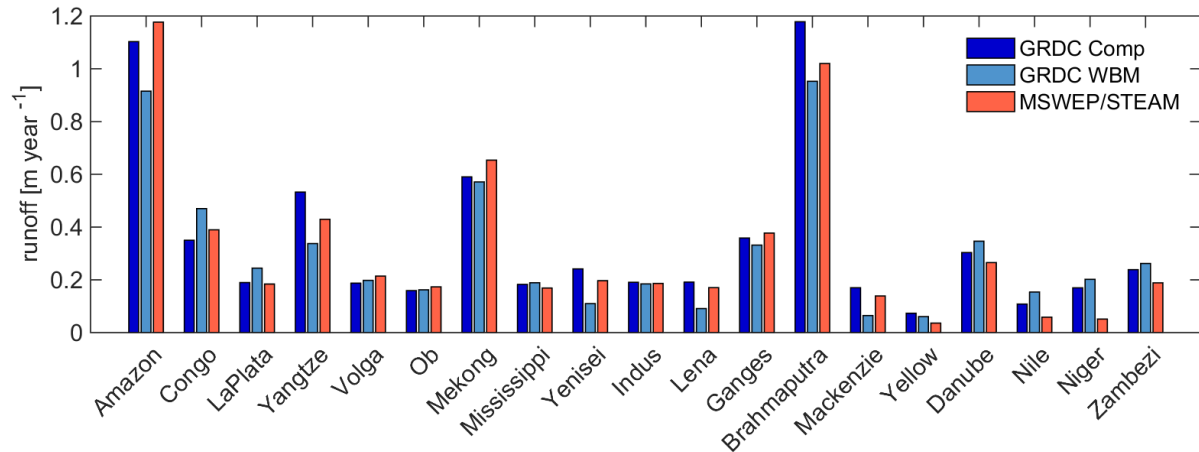

**Figure S2. River flow validation.** Comparison of simulated runoff (MSWEP/STEAM) with GRDC composite (GRDC Comp) and water balance model (GRDC WBM) runoff. MSWEP/STEAM deviates less from GRDC Comp (standard deviation  $\sigma = 0.0622 \text{ m yr}^{-1}$ ) than GRDC WBM ( $\sigma = 0.09993 \text{ m yr}^{-1}$ ). Note that GRDC runoff values not necessarily represent the best available observation data. For example in the River Niger, the GRDC discharge is around  $0.2 \text{ m/y}$  (Fig S8), while station data at Lokoja station for 1980-2013 shows that it is about  $0.07 \text{ m/y}$  (Oyerinde et al., 2017).

**Table S3.** Overview of studies of land-use induced changes in evaporation. Pure irrigation studies are included in this comparison with irrigation water consumption reported as “ $E$  increase”.

| Reference                      | Model; Prec. forcing | $E$ decreases                 |       | $E$ increases                 |      | Overall $E$ change            |       |
|--------------------------------|----------------------|-------------------------------|-------|-------------------------------|------|-------------------------------|-------|
|                                |                      | $\text{km}^3 \text{ yr}^{-1}$ | %     | $\text{km}^3 \text{ yr}^{-1}$ | %    | $\text{km}^3 \text{ yr}^{-1}$ | %     |
| (Döll and Siebert, 2002)       | WaterGAP; CRU        | -                             | -     | +1100                         | -    | -                             | -     |
| (Gordon et al., 2005)          | Reference E; UDEL    | -3000                         | - 4.5 | +2600                         | +3.9 | - 400                         | - 0.6 |
| (Rost et al., 2008b)           | LPJmL; HadCM3/CRU    | -2360                         | - 3.8 | +1325                         | +2.2 | -1036                         | - 1.7 |
| (Sterling et al., 2012)        | ORCHIDEE; NgoDuc05   | -                             | -     | -                             | -    | - 3160                        | - 5.6 |
| (Sterling et al., 2012)        | Literature-GIS; -    | -2800                         | -4.2  | +750                          | +1.1 | - 3500                        | - 5.3 |
| (Wada et al., 2014)            | PCR-GLOBWB; CRU      | -                             | -     | +1179                         | -    | -                             | -     |
| (Wada et al., 2014)            | PCR-GLOBWB; ERA-I    | -                             | -     | +1120                         | -    | -                             | -     |
| (Wada et al., 2014)            | PCR-GLOBWB; MERRA    | -                             | -     | +994                          | -    | -                             | -     |
| (Wang-Erlandsson et al., 2014) | STEAM; ERA-I         | -                             | -     | +1134                         | +1.5 | -                             | -     |
| (Jägermeyr et al., 2016)       | LPJmL; GPCC          | -                             | -     | +1268                         | -    | -                             | -     |
| This study                     | STEAM; MSWEP         | -2047                         | -3.0  | +796                          | +1.2 | - 1251                        | - 1.8 |

(a) Current land-use scenario

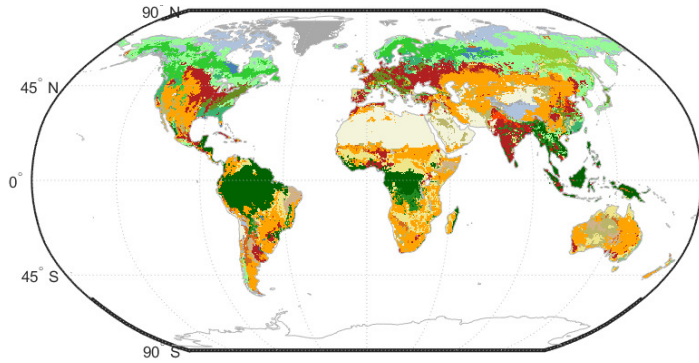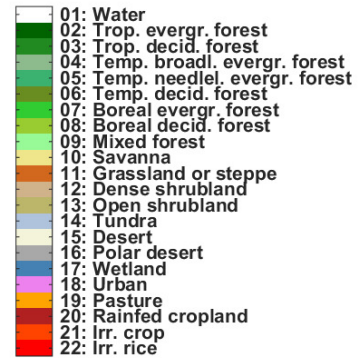

(b) Potential vegetation scenario

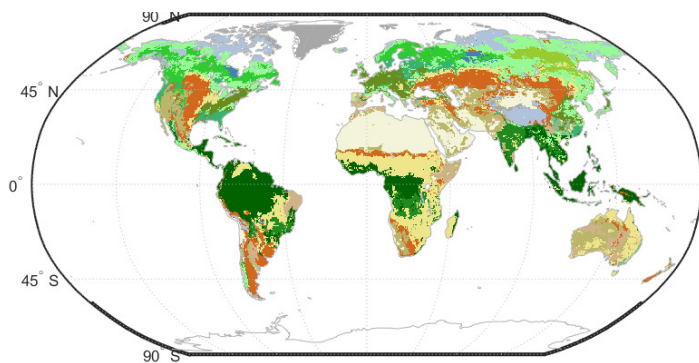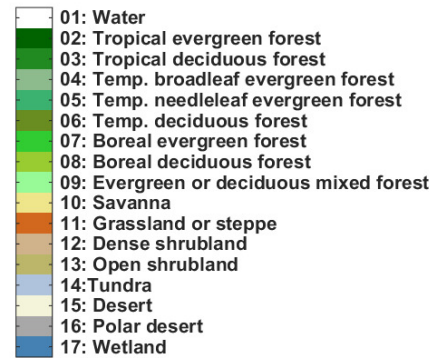

(c) Total areas of land types in the current land-use and potential vegetation scenarios

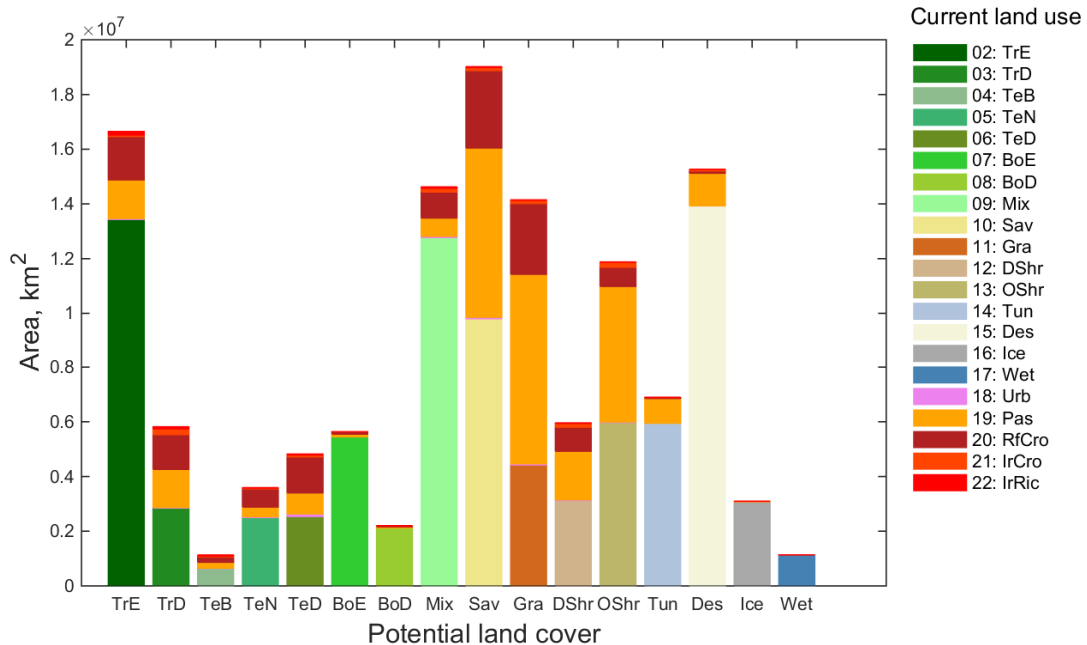

**Figure S3. Land-use scenarios used in this study:** **a**, current land use based on Ramankutty et al., (2008), MODIS, and MIRCA2000 (predominant land type shown, and irrigated areas represent the maximum extent over a year), **b**, potential vegetation based on Ramankutty and Foley, (1999) and MODIS, and **c**, total areas of different vegetation and land-use types.

**Table S4.** Overview of literature sources estimating human impact on river flows included in Fig. 5. Literature sources included are either global studies of potential land cover to current land use, or transient studies of river flow changes over the 20<sup>th</sup> century. Studies without global coverage are not included in the comparison, e.g., Gedney et al., (2006), Findell et al. (2007), Alkama et al. (2013), Labat et al. (2004), and Dai et al. (2009) are excluded due to smaller land areas than other studies included. The results of Labat et al. (2004) have also been contested by later studies (Alkama et al., 2011; Legates et al., 2005; Milliman et al., 2008). Dai et al. (2009) also only covers river flow changes 1948-2004. We do not assume evaporation change to correspond to river flow change, unless authors explicitly endorse the translation. This excludes for example Gordon et al. (2005) and Boisier et al. (2014) from the inter-comparison.

|                                   | Type                     | Time                    | Method                                                                                                                           | River flow change                                                                                                                         |
|-----------------------------------|--------------------------|-------------------------|----------------------------------------------------------------------------------------------------------------------------------|-------------------------------------------------------------------------------------------------------------------------------------------|
| <b>LUC</b>                        |                          |                         |                                                                                                                                  |                                                                                                                                           |
| R08a(Rost et al., 2008a)          | PV - > Cur               | 1971-2000               | Offline dynamic vegetation model LPJmL.                                                                                          | +1306 km <sup>3</sup> yr <sup>-1</sup>                                                                                                    |
| R08b(Rost et al., 2008b)          | PV - > Cur               | 1991-2000               | Offline dynamic vegetation model LPJmL.                                                                                          | +1770 km <sup>3</sup> yr <sup>-1</sup>                                                                                                    |
| S12(Sterling et al., 2012)        | PV - > Cur               | Mixed                   | Literature and statistical modelling in GIS.                                                                                     | +3500 km <sup>3</sup> yr <sup>-1</sup>                                                                                                    |
| S12(Sterling et al., 2012)        | PV - > Cur               | 1950-2000               | Offline land surface model ORCHIDEE.                                                                                             | +3869 km <sup>3</sup> yr <sup>-1</sup>                                                                                                    |
| P07(Piao et al., 2007)            | 20 <sup>th</sup> century | 1901-1999               | Offline land surface model ORCHIDEE.                                                                                             | +1089 km <sup>3</sup> yr <sup>-1</sup>                                                                                                    |
| G08(Gerten et al., 2008)          | 20 <sup>th</sup> century | 1901-2002               | Offline dynamic vegetation model LPJmL. Trend from land-use change simulation using CRU precipitation.                           | +680 km <sup>3</sup> yr <sup>-1</sup>                                                                                                     |
| <b>Climate change</b>             |                          |                         |                                                                                                                                  |                                                                                                                                           |
| P07(Piao et al., 2007)            | 20 <sup>th</sup> century | 1901-1999               | Offline land surface model ORCHIDEE. Climate change excluding CO <sub>2</sub> effect.                                            | +1771 km <sup>3</sup> yr <sup>-1</sup>                                                                                                    |
| G08(Gerten et al., 2008)          | 20 <sup>th</sup> century | 1901-2002               | Offline dynamic vegetation model LPJmL. Trend from precipitation P and temperature T change simulation using CRU precipitation.  | +2600 km <sup>3</sup> yr <sup>-1</sup> (P),<br>-360 km <sup>3</sup> yr <sup>-1</sup> (T),<br>+2240 km <sup>3</sup> yr <sup>-1</sup> (P+T) |
| A10(Alkama et al., 2010)          | 20 <sup>th</sup> century | 1901-2000               | Offline land surface model ORCHIDEE. Climate change effect only.                                                                 | +2477 km <sup>3</sup> yr <sup>-1</sup>                                                                                                    |
| <b>CO<sub>2</sub> effect</b>      |                          |                         |                                                                                                                                  |                                                                                                                                           |
| P07(Piao et al., 2007)            | 20 <sup>th</sup> century | 1901-1999               | Offline land surface model ORCHIDEE. CO <sub>2</sub> allowing LAI change.                                                        | -545 km <sup>3</sup> yr <sup>-1</sup>                                                                                                     |
| G08(Gerten et al., 2008)          | 20 <sup>th</sup> century | 1901-2002               | Offline dynamic vegetation model LPJmL. Trend from CO <sub>2</sub> simulation.                                                   | +480 km <sup>3</sup> yr <sup>-1</sup>                                                                                                     |
| A10(Alkama et al., 2010)          | 20 <sup>th</sup> century | 1901-2000               | Offline land surface model ORCHIDEE. CO <sub>2</sub> effect only.                                                                | +275 km <sup>3</sup> yr <sup>-1</sup>                                                                                                     |
| <b>Water consumption</b>          |                          |                         |                                                                                                                                  |                                                                                                                                           |
| R08a(Rost et al., 2008a)          | PV - > Cur               | 1971-2000               | Offline dynamic vegetation model LPJmL. Excluding nonlocal blue water (ILIM).                                                    | -457 km <sup>3</sup> yr <sup>-1</sup>                                                                                                     |
| G08(Gerten et al., 2008)          | 20 <sup>th</sup> century | 1901-2002               | Offline dynamic vegetation model LPJmL. Trend from irrigation simulation.                                                        | -120 km <sup>3</sup> yr <sup>-1</sup>                                                                                                     |
| D09(Döll et al., 2009)            | PV - > Cur               | 2002                    | Offline hydrological model WaterGAP.                                                                                             | -1300-1400 km <sup>3</sup> yr <sup>-1</sup>                                                                                               |
| S12(Sterling et al., 2012)        | PV - > Cur               | Mixed                   | Literature review of withdrawal. Assuming water consumption to be 52 % of total withdrawal.                                      | -1250 km <sup>3</sup> yr <sup>-1</sup>                                                                                                    |
| J15(Jaramillo and Destouni, 2015) | 20 <sup>th</sup> century | 1901-1954 vs. 1955-2008 | Analyses of hydroclimatic data for 100 large basins (35 % global land area).                                                     | -4370 km <sup>3</sup> yr <sup>-1</sup> (±979 km <sup>3</sup> yr <sup>-1</sup> )                                                           |
| <b>Overall human impact</b>       |                          |                         |                                                                                                                                  |                                                                                                                                           |
| G08(Gerten et al., 2008)          | 20 <sup>th</sup> century | 1901-2002               | Offline dynamic vegetation model LPJmL. Sum of precipitation, temperature, land-use change, CO <sub>2</sub> , irrigation effect. | +3280 km <sup>3</sup> yr <sup>-1</sup>                                                                                                    |
| S12(Sterling et al., 2012)        | Mixed                    | Mixed                   | Mean change from literature review.                                                                                              | +1500 km <sup>3</sup> yr <sup>-1</sup>                                                                                                    |

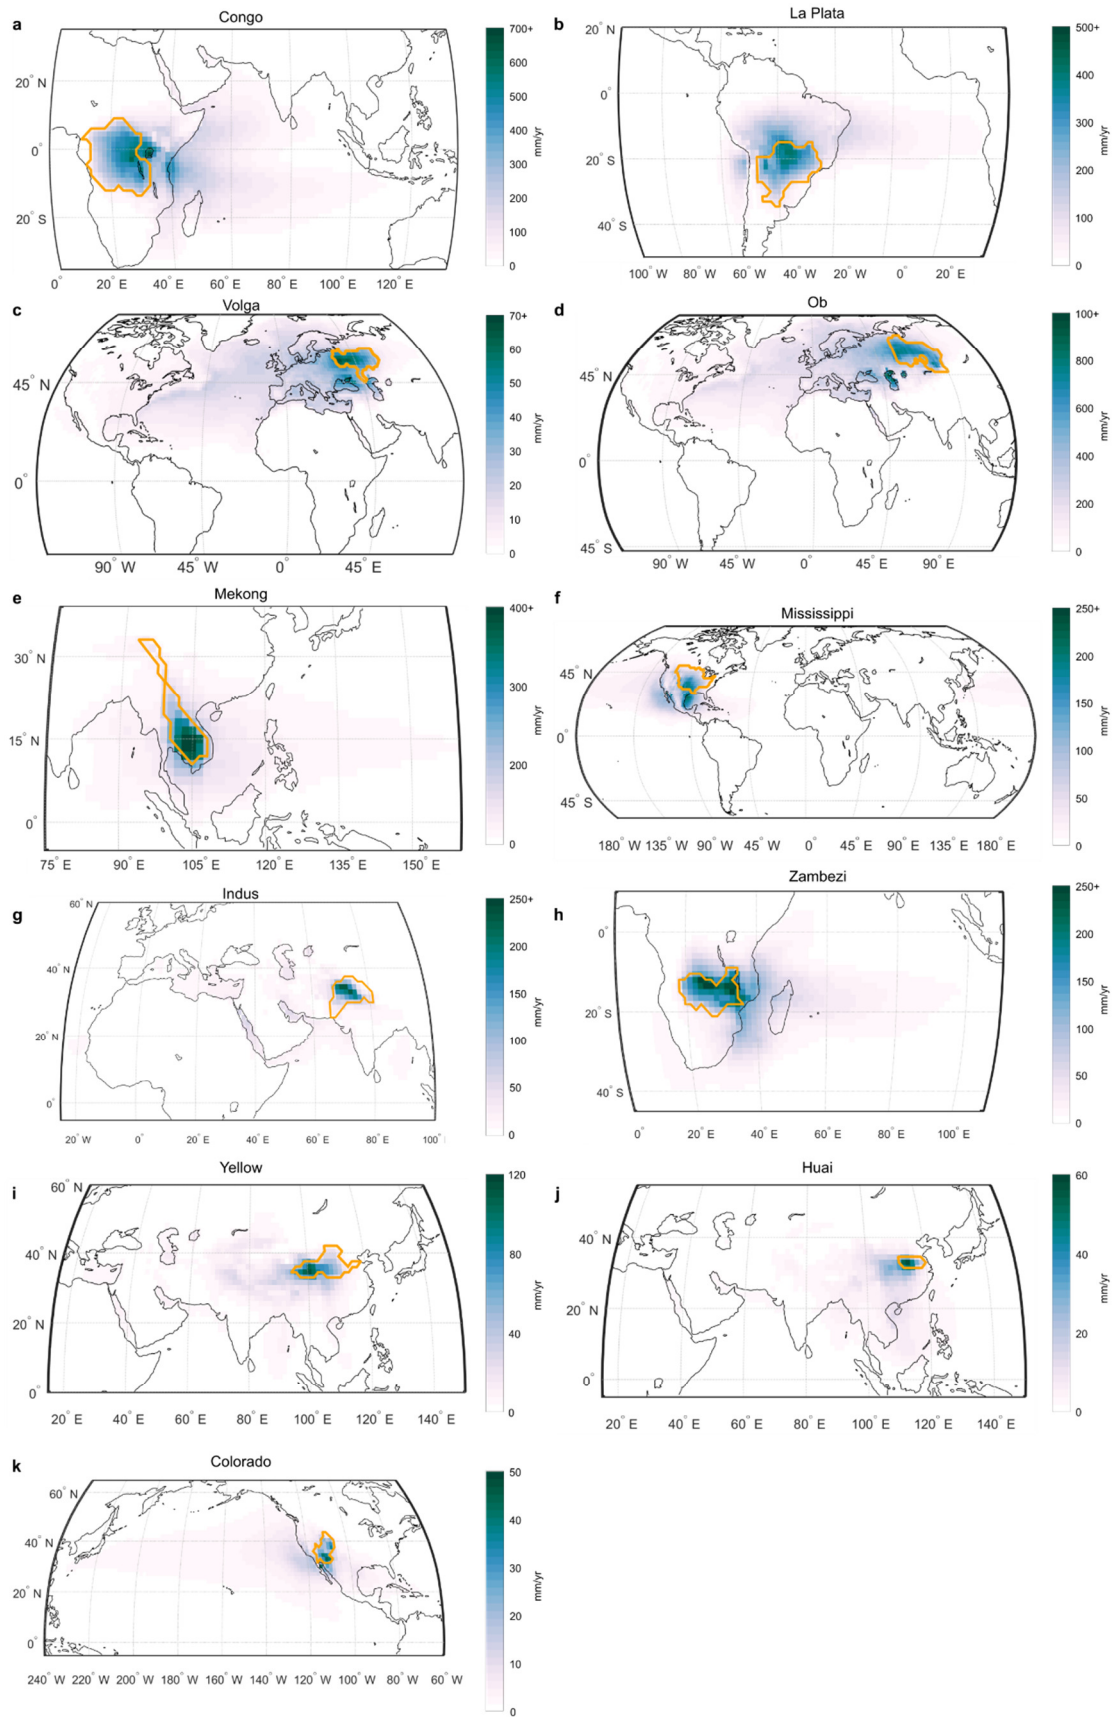

Figure S4. Mean annual precipitation sources for selected river basins (boundaries in orange).

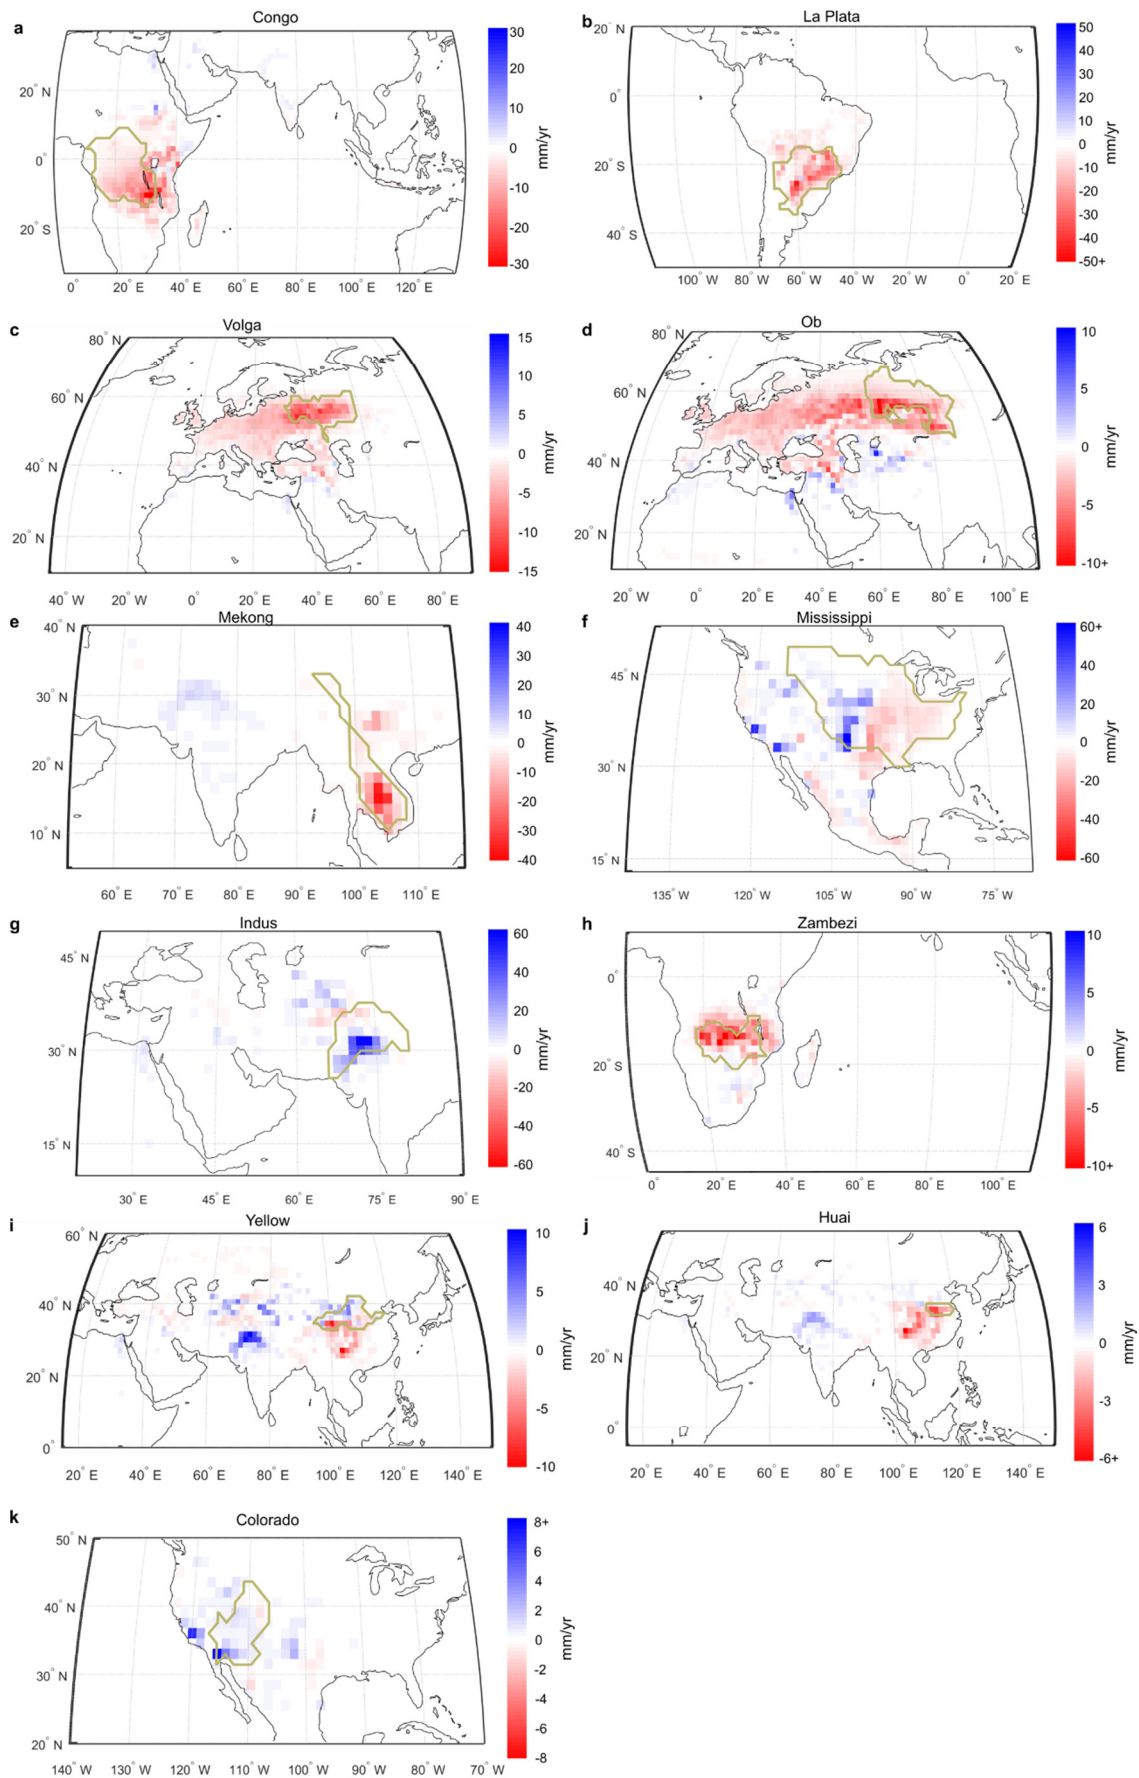

**Figure S5.** Impacts of human land-use change on mean annual precipitation source (i.e.,  $\Delta P_{\text{import}} + \Delta P_{\text{basin-recycling}}$ ) for selected river basins (boundaries in dark yellow).

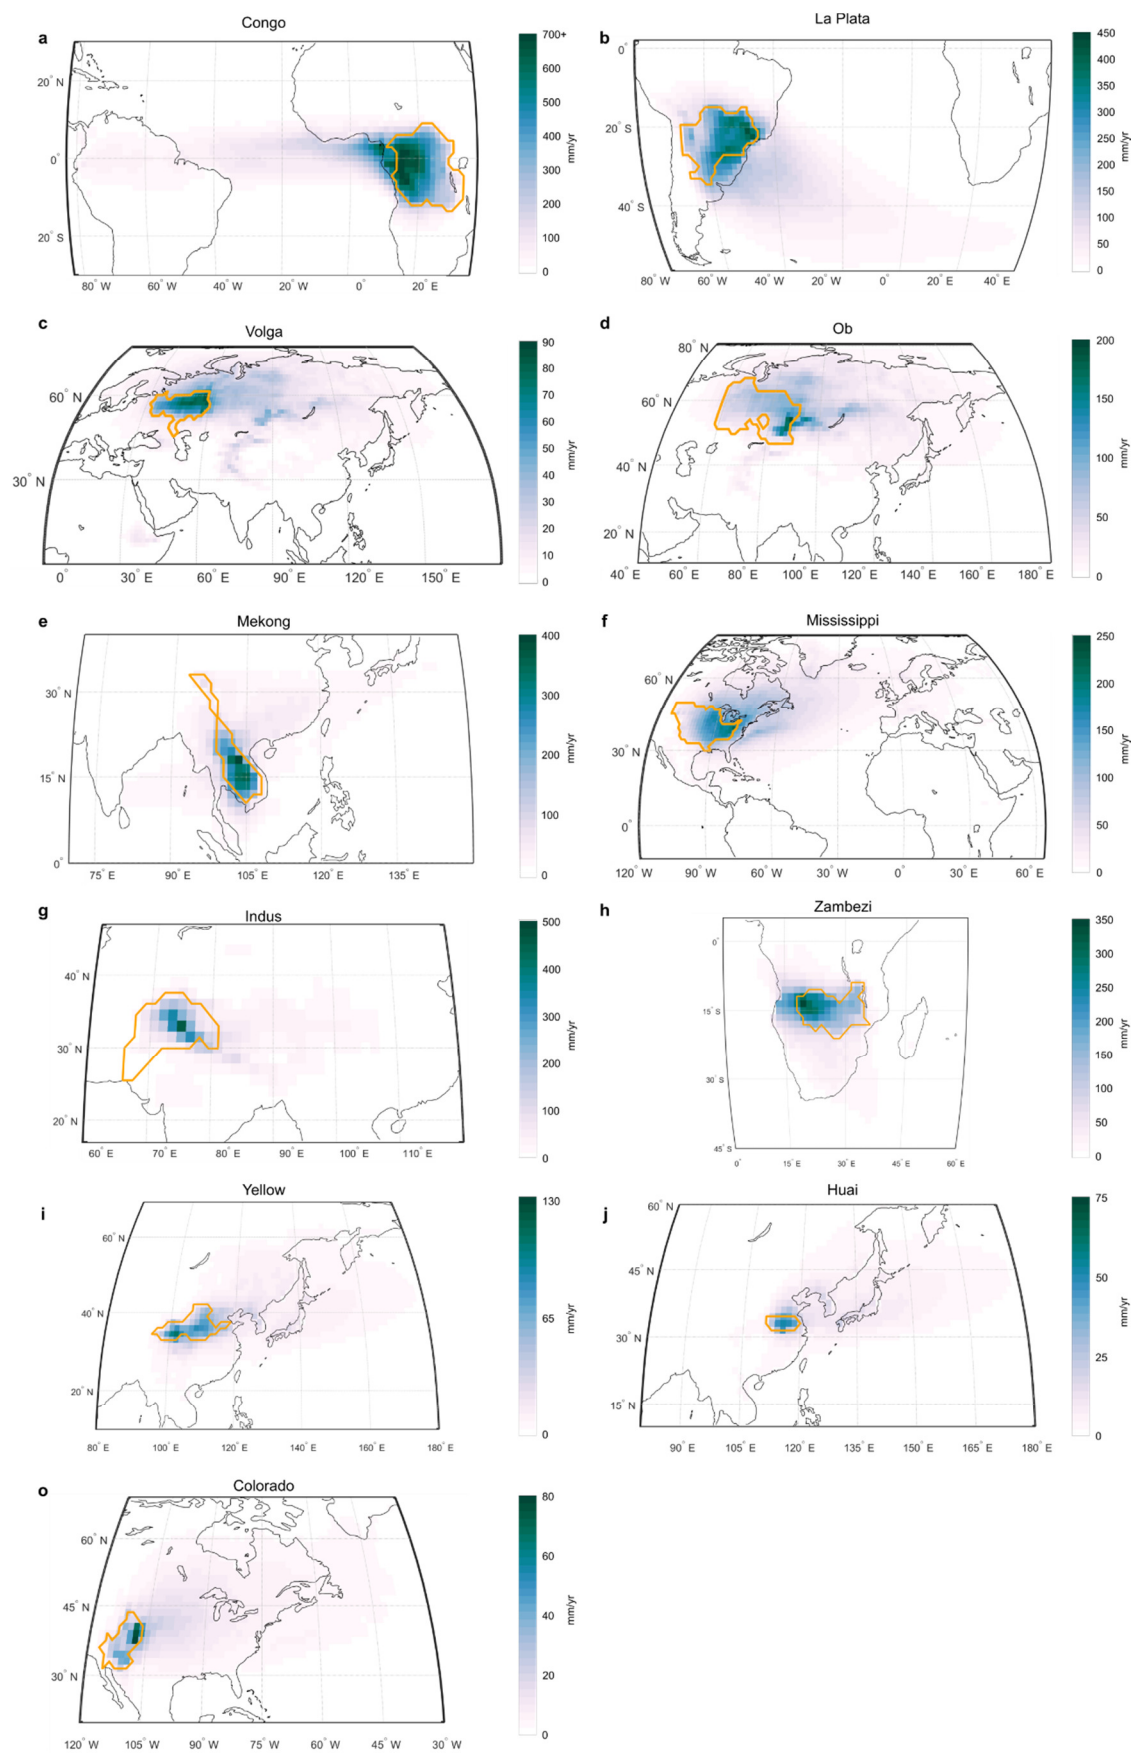

Figure S6. Mean annual evaporation sinks for selected river basins (boundaries in orange).



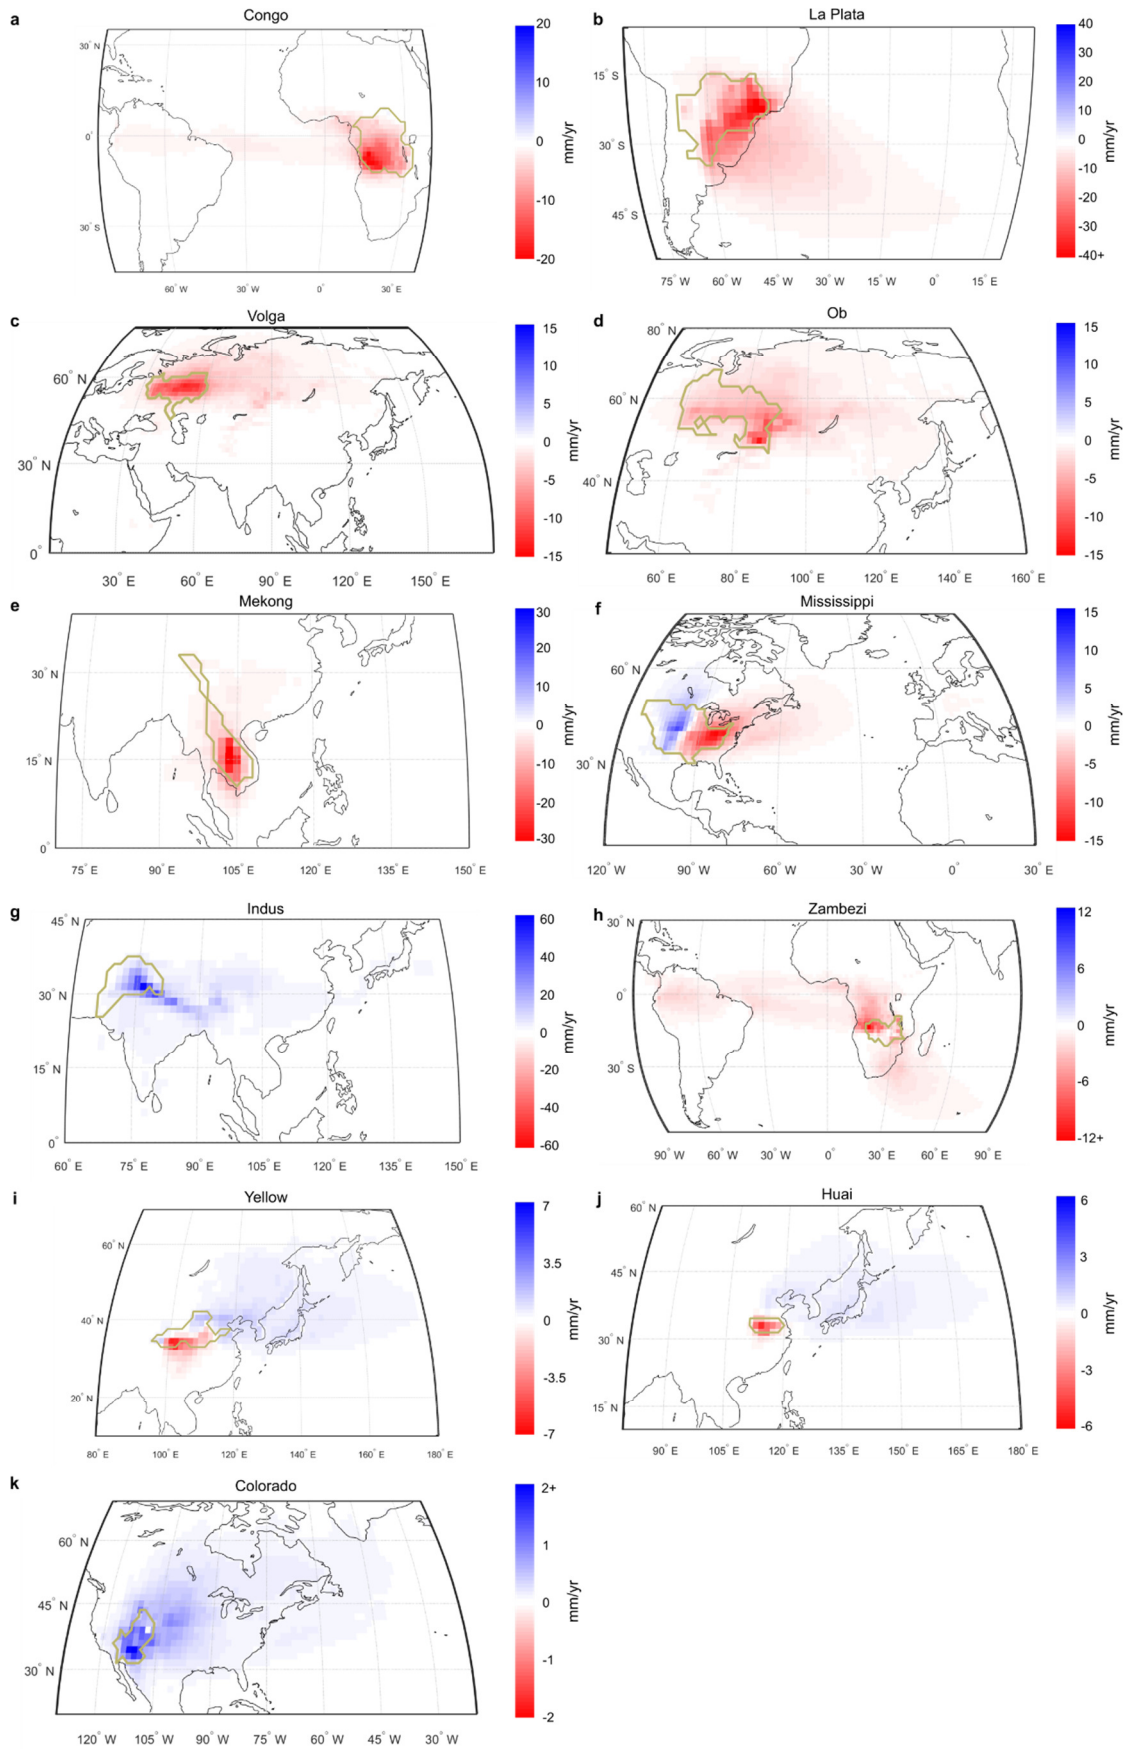

**Figure S7.** Impacts of human land-use change on mean annual evaporation sink (i.e.,  $\Delta E_{\text{export}} + \Delta E_{\text{basin-recycling}}$ ) for selected river basins (boundaries in dark yellow).

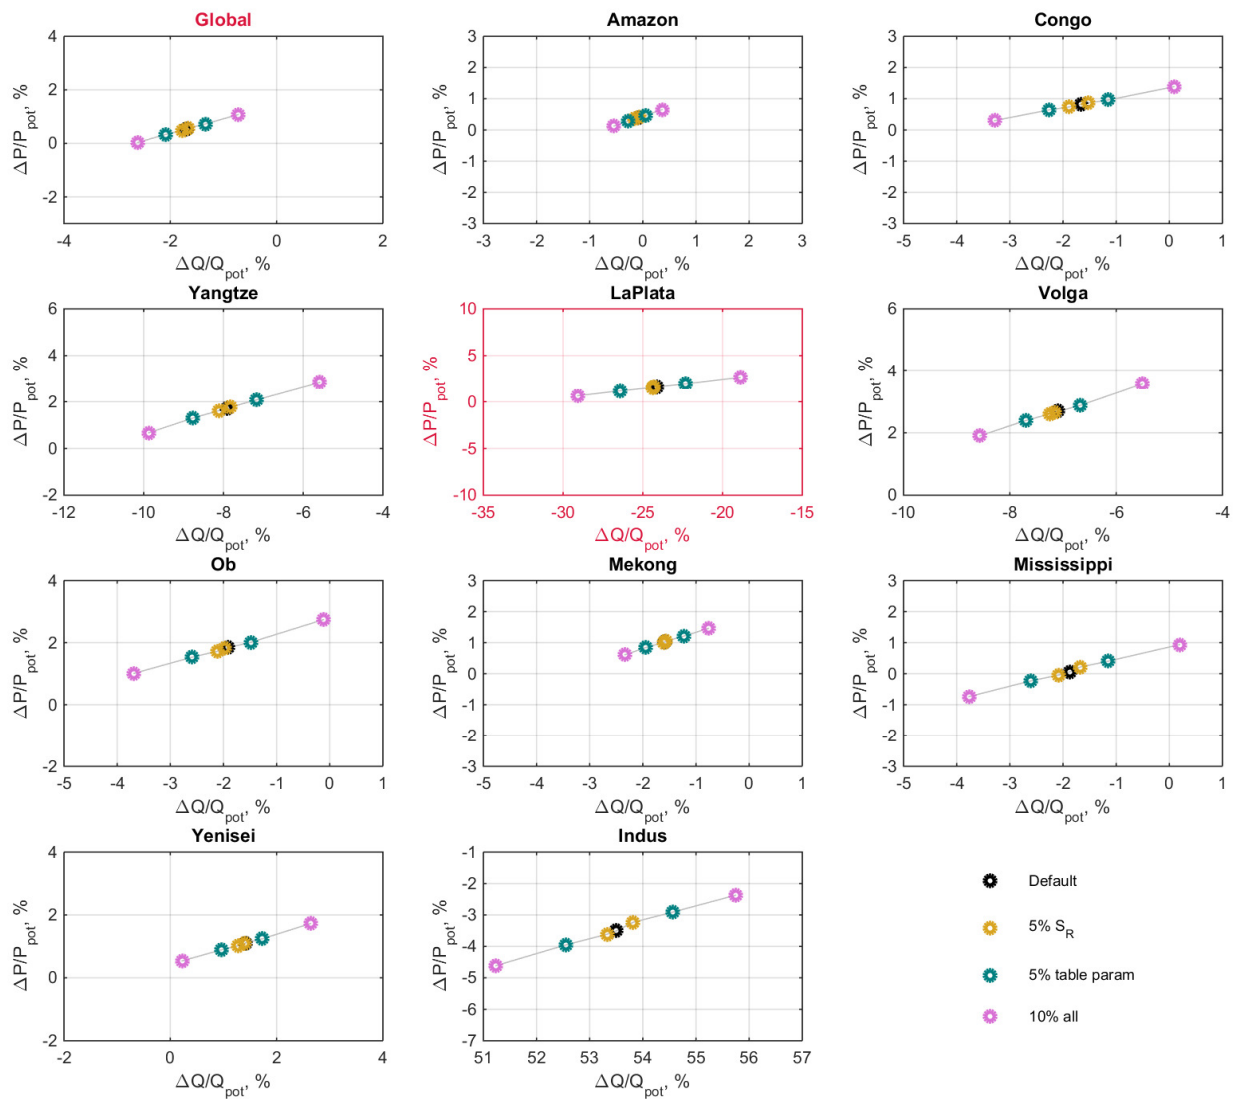

**Figure S8. Sensitivity analysis.** The relationship between annual mean precipitation change and river flow change under different perturbations of STEAM parameter values in pasture and croplands. The three different sets of perturbation experiments are: 5 % increase and decrease of root zone storage capacity  $S_R$  (green circles), 5% perturbation of six tabulated land parameters in a direction that causes either increase or decrease in evaporation (blue circles), and 10 % perturbation of both  $S_R$  and the six tabulated land parameters in a direction that causes either increase or decrease in evaporation (purple circles). Note that in each experiment, the parameter values are perturbed in the same direction in terms of increase or decrease in evaporation. The six look-up table parameters are maximum leaf area index  $LAI_{max}$ , minimum leaf area index  $LAI_{min}$ , albedo  $\alpha$ , maximum plant height  $h_{max}$ , minimum plant height  $h_{min}$ , and minimum stomatal resistance  $r_{st,min}$ . Except for La Plata, the different plots have identical scales and can therefore be compared to each other. Evaporation simulation in Mississippi and Indus can be slightly sensitive to initial soil moisture conditions (not shown). Presented results are from simulations for the years 2000-2002.

## SI references

- Alkama, R., Kageyama, M. and Ramstein, G.: Relative contributions of climate change, stomatal closure, and leaf area index changes to 20th and 21st century runoff change: A modelling approach using the Organizing Carbon and Hydrology in Dynamic Ecosystems (ORCHIDEE) land surface model, *J. Geophys. Res. Atmos.*, 115(17), D17112, doi:10.1029/2009JD013408, 2010.
- Alkama, R., Decharme, B., Douville, H. and Ribes, A.: Trends in Global and Basin-Scale Runoff over the Late Twentieth Century: Methodological Issues and Sources of Uncertainty, *J. Clim.*, 24(12), 3000–3014, doi:10.1175/2010JCLI3921.1, 2011.
- Alkama, R., Marchand, L., Ribes, A. and Decharme, B.: Detection of global runoff changes: results from observations and CMIP5 experiments, *Hydrol. Earth Syst. Sci.*, 17(7), 2967–2979, doi:10.5194/hess-17-2967-2013, 2013.
- Bagley, J. E., Desai, A. R., Harding, K. J., Snyder, P. K. and Foley, J. a.: Drought and Deforestation: Has land cover change influenced recent precipitation extremes in the Amazon?, *J. Clim.*, 27, 345–361, doi:10.1175/JCLI-D-12-00369.1, 2014.
- Betts, R. A., Golding, N., Gonzalez, P., Gornall, J., Kahana, R., Kay, G., Mitchell, L. and Wiltshire, A.: Climate and land use change impacts on global terrestrial ecosystems and river flows in the HadGEM2-ES Earth system model using the representative concentration pathways, *Biogeosciences*, 12(5), 1317–1338, doi:10.5194/bg-12-1317-2015, 2015.
- Boisier, J. P., De Noblet-Ducoudré, N. and Ciais, P.: Historical land-use-induced evapotranspiration changes estimated from present-day observations and reconstructed land-cover maps, *Hydrol. Earth Syst. Sci.*, 11(9), 2045–2089, doi:10.5194/hessd-11-2045-2014, 2014.
- Bring, A., Asokan, S. M., Jaramillo, F., Jarsjö, J., Levi, L., Pietroń, J., Prieto, C., Rogberg, P. and Destouni, G.: Implications of freshwater flux data from the CMIP5 multimodel output across a set of Northern Hemisphere drainage basins, *Earth's Futur.*, 3(6), 206–217, doi:10.1002/2014EF000296, 2015.
- Dai, A., Qian, T., Trenberth, K. E. and Milliman, J. D.: Changes in continental freshwater discharge from 1948 to 2004, *J. Clim.*, 22(10), 2773–2792, doi:10.1175/2008JCLI2592.1, 2009.
- Döll, P. and Siebert, S.: Global modeling of irrigation water requirements, *Water Resour. Res.*, 38(4), 8-1-8–10, doi:10.1029/2001WR000355, 2002.
- Döll, P., Fiedler, K. and Zhang, J.: Global-scale analysis of river flow alterations due to water withdrawals and reservoirs, *Hydrol. Earth Syst. Sci.*, 13(12), 2413–2432, doi:10.5194/hess-13-2413-2009, 2009.
- Findell, K. L., Shevliakova, E., Milly, P. C. D., Stouffer, R. J., Findell, K. L., Shevliakova, E., Milly, P. C. D. and Stouffer, R. J.: Modeled Impact of Anthropogenic Land Cover Change on Climate, *J. Clim.*, 20(14), 3621–3634, doi:10.1175/JCLI4185.1, 2007.
- Garcia, E. S., Swann, A. L. S., Villegas, J. C., Breshears, D. D., Law, D. J., Saleska, S. R. and Stark, S. C.: Synergistic ecoclimate teleconnections from forest loss in different regions structure global ecological responses, edited by S. Joseph, *PLoS One*, 11(11), e0165042, doi:10.1371/journal.pone.0165042, 2016.
- Gedney, N., Cox, P. M., Betts, R. A., Boucher, O., Huntingford, C. and Stott, P. A.: Detection of a direct carbon dioxide effect in continental river runoff records, *Nature*, 439(7078), 835–838, doi:10.1038/nature04504, 2006.
- Gerten, D., Rost, S., von Bloh, W. and Lucht, W.: Causes of change in 20th century global river

- discharge, *Geophys. Res. Lett.*, 35(20), L20405, doi:10.1029/2008GL035258, 2008.
- Gordon, L. J., Steffen, W., Jönsson, B. F., Folke, C., Falkenmark, M., Johannessen, A. and Johannessen, Å.: Human modification of global water vapor flows from the land surface., *Proc. Natl. Acad. Sci. U. S. A.*, 102(21), 7612–7617, doi:10.1073/pnas.0500208102, 2005.
- Jägermeyr, J., Gerten, D., Schaphoff, S., Heinke, J., Lucht, W. and Rockström, J.: Integrated crop water management might sustainably halve the global food gap, *Environ. Res. Lett.*, 11(2), 025002, doi:10.1088/1748-9326/11/2/025002, 2016.
- Jaramillo, F. and Destouni, G.: Local flow regulation and irrigation raise global human water consumption and footprint, *Science*, 350(6265), 1248–1251, doi:10.1126/science.aad1010, 2015.
- Keys, P. W., Wang-Erlandsson, L. and Gordon, L. J.: Revealing Invisible Water: Moisture Recycling as an Ecosystem Service., *PLoS One*, 11(3), e0151993, doi:10.1371/journal.pone.0151993, 2016.
- Labat, D., Goddérès, Y., Probst, J. L. and Guyot, J. L.: Evidence for global runoff increase related to climate warming, *Adv. Water Resour.*, 27(6), 631–642, doi:10.1016/j.advwatres.2004.02.020, 2004.
- Lawrence, D. and Vandecar, K.: Effects of tropical deforestation on climate and agriculture, *Nat. Clim. Chang.*, 5(1), 27–36, doi:10.1038/nclimate2430, 2014.
- Legates, D. R., Lins, H. F. and McCabe, G. J.: Comments on “Evidence for global runoff increase related to climate warming” by Labat et al., *Adv. Water Resour.*, 28(12), 1310–1315, doi:10.1016/j.advwatres.2005.04.006, 2005.
- Milliman, J. D., Farnsworth, K. L., Jones, P. D., Xu, K. H. and Smith, L. C.: Climatic and anthropogenic factors affecting river discharge to the global ocean, 1951–2000, *Glob. Planet. Change*, 62(3), 187–194, doi:10.1016/j.gloplacha.2008.03.001, 2008.
- Oyerinde, G. T., Fademi, I. O. and Denton, O. A.: Modeling runoff with satellite-based rainfall estimates in the Niger basin, edited by M. Tejada Moral, *Cogent Food Agric.*, 3(1), doi:10.1080/23311932.2017.1363340, 2017.
- Piao, S., Friedlingstein, P., Ciais, P., de Noblet-Ducoudré, N., Labat, D. and Zaehle, S.: Changes in climate and land use have a larger direct impact than rising CO<sub>2</sub> on global river runoff trends., *Proc. Natl. Acad. Sci. U. S. A.*, 104(39), 15242–15247, doi:10.1073/pnas.0707213104, 2007.
- Pitman, A. J., de Noblet-Ducoudré, N., Cruz, F. T., Davin, E. L., Bonan, G. B., Brovkin, V., Claussen, M., Delire, C., Ganzeveld, L., Gayler, V., van den Hurk, B. J. J. M., Lawrence, P. J., van der Molen, M. K., Müller, C., Reick, C. H., Seneviratne, S. I., Strengers, B. J. and Voldoire, A.: Uncertainties in climate responses to past land cover change: First results from the LUCID intercomparison study, *Geophys. Res. Lett.*, 36(14), 1–6, doi:10.1029/2009GL039076, 2009.
- Ramankutty, N. and Foley, J. A.: Estimating historical changes in global land cover: Croplands historical have converted areas, *Global Biogeochem. Cycles*, 13(4), 997–1027, 1999.
- Ramankutty, N., Evan, A. T., Monfreda, C. and Foley, J. A.: Farming the planet: 1. Geographic distribution of global agricultural lands in the year 2000, *Global Biogeochem. Cycles*, 22(1), 1–19, doi:10.1029/2007GB002952, 2008.
- Reyer, C. P. O., Brouwers, N., Rammig, A., Brook, B. W., Epila, J., Grant, R. F., Holmgren, M., Langerwisch, F., Leuzinger, S., Lucht, W., Medlyn, B., Pfeifer, M., Steinkamp, J., Vanderwel, M. C., Verbeeck, H. and Vilella, D. M.: Forest resilience and tipping points at different spatio-temporal scales: Approaches and challenges, edited by D. Coomes, *J. Ecol.*, 103(1), 5–15, doi:10.1111/1365-2745.12337, 2015.
- Rost, S., Gerten, D., Bondeau, A., Lucht, W., Rohwer, J. and Schaphoff, S.: Agricultural green and blue

water consumption and its influence on the global water system, *Water Resour. Res.*, 44, W09405, doi:10.1029/2007WR006331, 2008a.

Rost, S., Gerten, D. and Heyder, U.: Human alterations of the terrestrial water cycle through land management, *Adv. Geosci.*, 18(18), 43–50, doi:10.5194/adgeo-18-43-2008, 2008b.

Spracklen, D. V. and Garcia-Carreras, L.: The impact of Amazonian deforestation on Amazon basin rainfall, *Geophys. Res. Lett.*, 42, 9546–9552, doi:10.1002/2015GL066063, 2015.

Spracklen, D. V., Arnold, S. R. and Taylor, C. M.: Observations of increased tropical rainfall preceded by air passage over forests, *Nature*, 489(7415), 282–285, doi:10.1038/nature11390, 2012.

Sterling, S. M., Ducharne, A. and Polcher, J.: The impact of global land-cover change on the terrestrial water cycle, *Nat. Clim. Chang.*, 3(4), 385–390, doi:10.1038/nclimate1690, 2012.

Wada, Y., Wisser, D. and Bierkens, M. F. P.: Global modeling of withdrawal, allocation and consumptive use of surface water and groundwater resources, *Earth Syst. Dyn.*, 5(1), 15–40, doi:10.5194/esd-5-15-2014, 2014.

Wang-Erlandsson, L., van der Ent, R. J., Gordon, L. J. and Savenije, H. H. G.: Contrasting roles of interception and transpiration in the hydrological cycle – Part 1: Temporal characteristics over land, *Earth Syst. Dyn.*, 5(2), 441–469, doi:10.5194/esd-5-441-2014, 2014.

Wang-Erlandsson, L., Bastiaanssen, W. G. M., Gao, H., Jägermeyr, J., Senay, G. B., van Dijk, A. I. J. M., Guerschman, J. P., Keys, P. W., Gordon, L. J. and Savenije, H. H. G.: Global root zone storage capacity from satellite-based evaporation, *Hydrol. Earth Syst. Sci.*, 20(4), 1459–1481, doi:10.5194/hess-20-1459-2016, 2016.
